# Supplementary material for: Structure of H2Ti3O7and its evolution during sodium insertion as anode for Na ion batteries
Source: Royal Society of Chemistry journal article supplement (doi:10.1039/c4cp03345k), 2015-01-01
Supplement: c4cp03345k1.pdf [file c4cp03345k1.pdf]

## SUPPLEMENTARY INFORMATION

### **Sodium Insertion in $\text{H}_2\text{Ti}_3\text{O}_7$ for Na Ion Batteries**

*Aitor Eguía-Barrio<sup>a,b</sup>, Elizabeth Castillo-Martínez<sup>a,\*</sup>, Maider Zarrabeitia,<sup>a</sup>*

*Miguel A. Muñoz-Márquez,<sup>a</sup>, Montse Casas-Cabanas<sup>a</sup>, Teófilo Rojo<sup>a,b,\*</sup>*

<sup>a</sup> CIC Energigune, C/Albert Einstein 48, 01510, Parque Tecnológico de Álava, Miñano, Spain.

<sup>b</sup> Departamento de Química Inorgánica, Universidad del País Vasco, UPV/EHU, Bilbao, Spain.

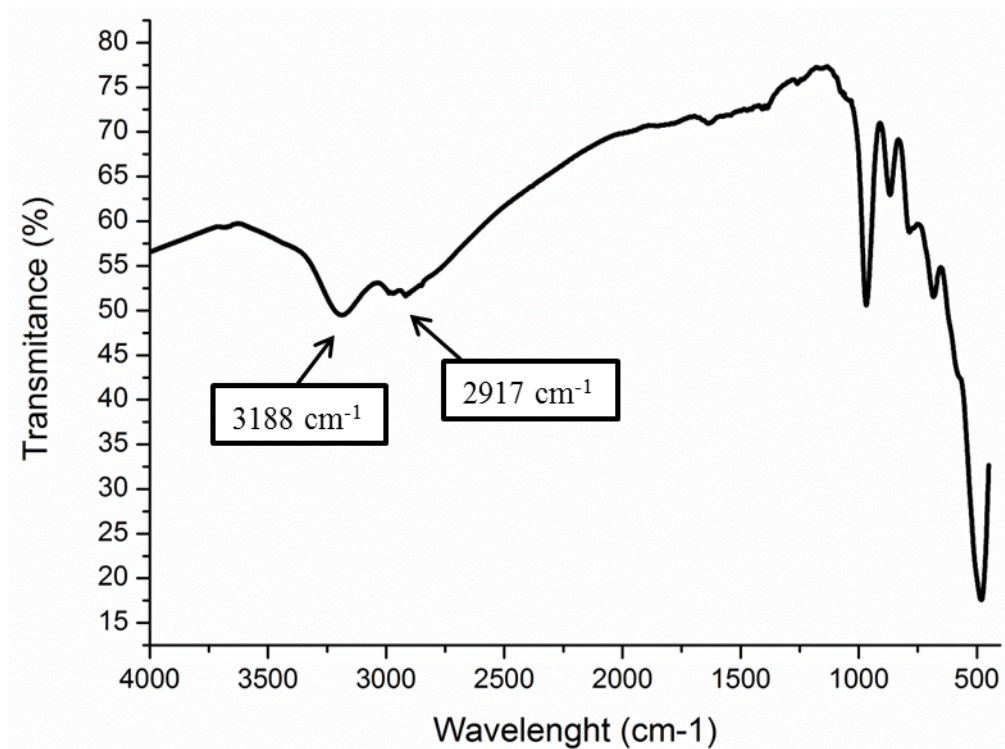

**Figure S 1.** Experimental FTIR spectra from  $4000\text{cm}^{-1}$  to  $450\text{cm}^{-1}$  of pristine  $\text{H}_2\text{Ti}_3\text{O}_7$ . It can be observed two signals from the different types of protons.

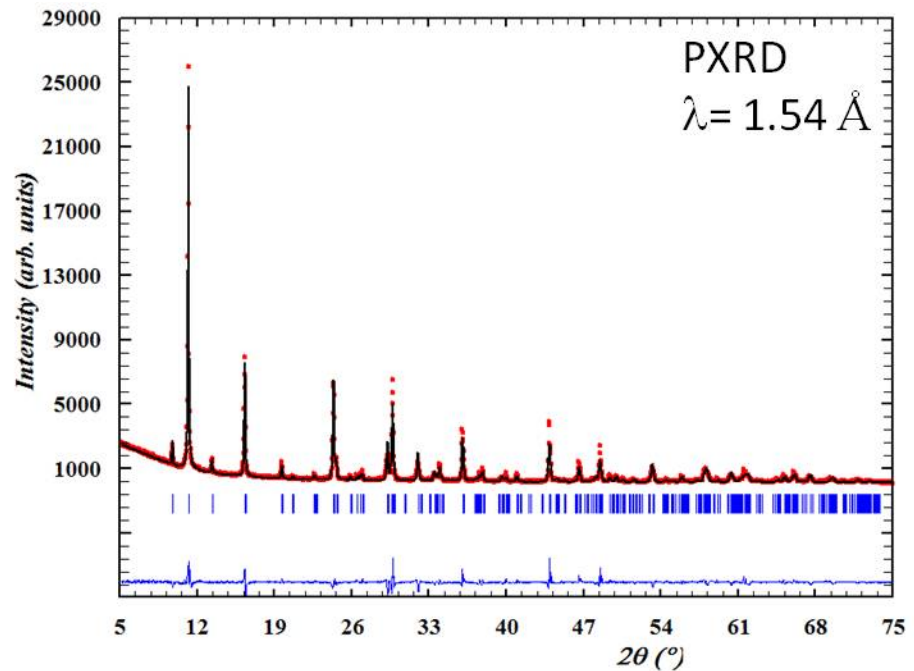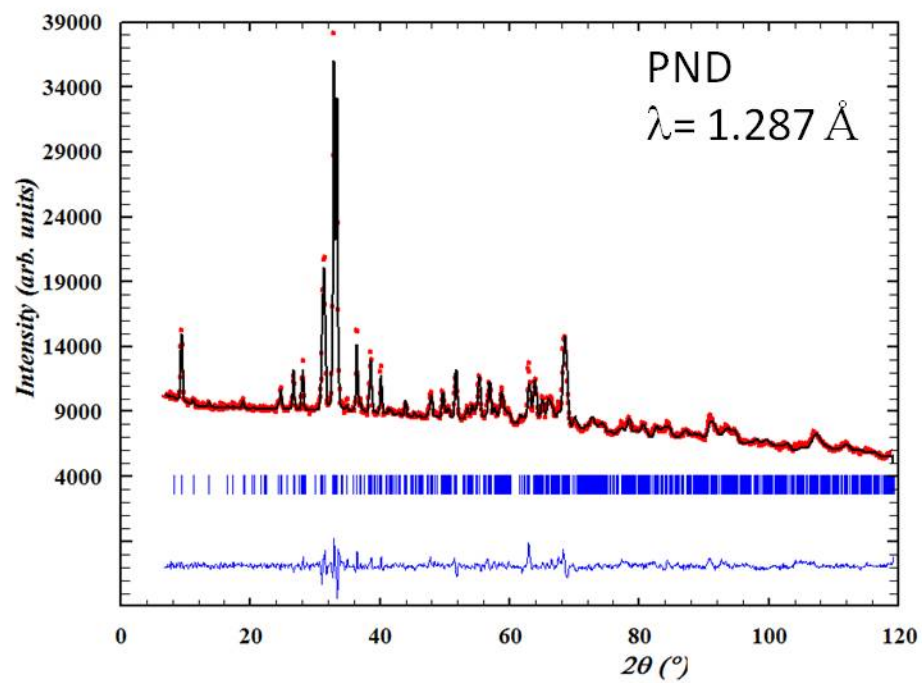

**Figure S 2.** Plot of the Rietveld refined X-ray ( $\lambda=1.54 \text{ \AA}$ ) and neutron diffraction data collected at  $\lambda=1.287 \text{ \AA}$  from the combined refinement of X-ray diffraction and neutron diffraction at two different wavelengths of  $\text{H}_2\text{Ti}_3\text{O}_7$  at room temperature with space group  $C2/m$ . Experimental (red points) observed (black line) and difference (blue line) Bragg reflections are marked in Blue. Agreement factors, refined atomic position and interatomic distances are listed in Tables S1 and S2.

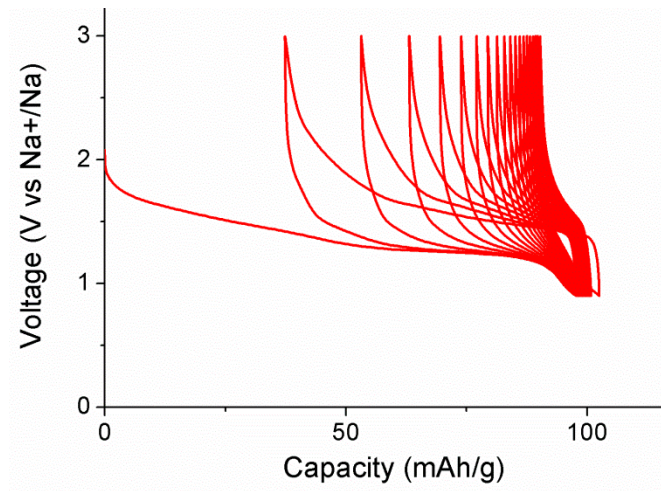

**Figure S 3.** Galvanostatic cycling of of  $\text{H}_2\text{Ti}_3\text{O}_7$  in the 0.9-2.2V (cycles 1-10) at C/10.

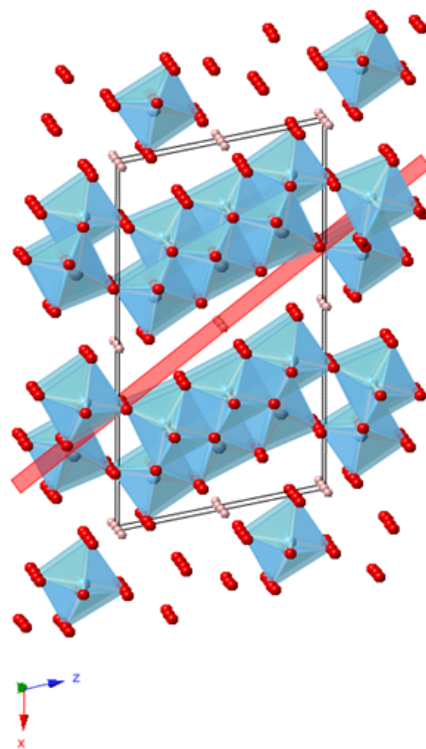

**Figure S 4.** Structure of  $\text{H}_2\text{Ti}_3\text{O}_7$  with the 602 plane that shows the most pronounced changes during the initial states of sodiation indicated in red.

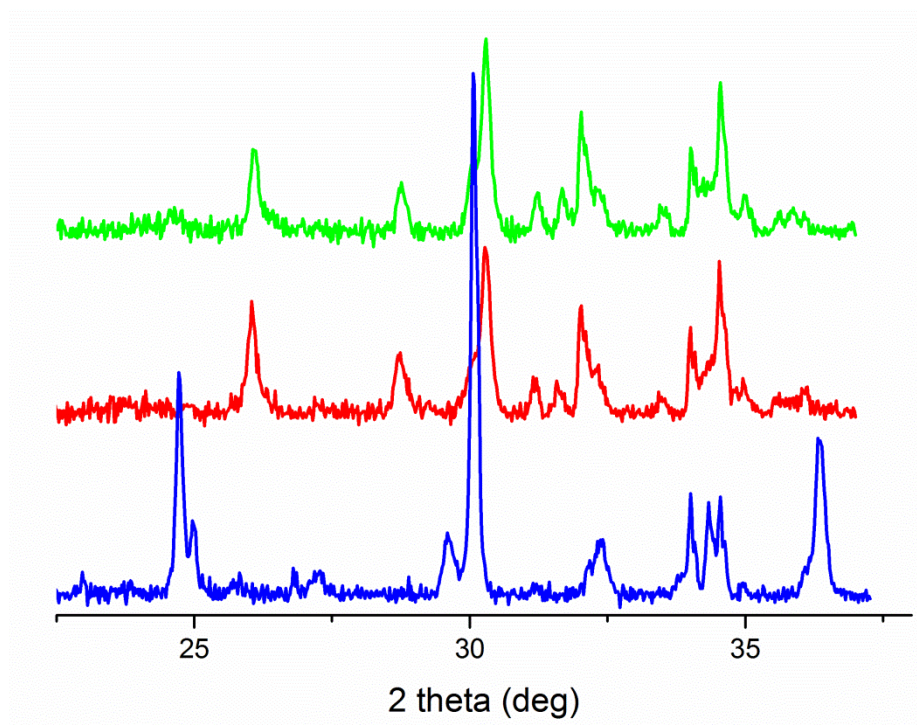

**Figure S 5.** Selected XRD patterns during the in-situ experiment. (background subtracted). From bottom to top: Pristine  $\text{H}_2\text{Ti}_3\text{O}_7$  (blue) reduced nominal " $\text{H}_2\text{Na}_{1.2}\text{Ti}_{1.8}^{\text{IV}}\text{Ti}_{1.2}^{\text{III}}\text{O}_7$ " down to 0.9V (red), reoxidized material up to 2.2V (green).

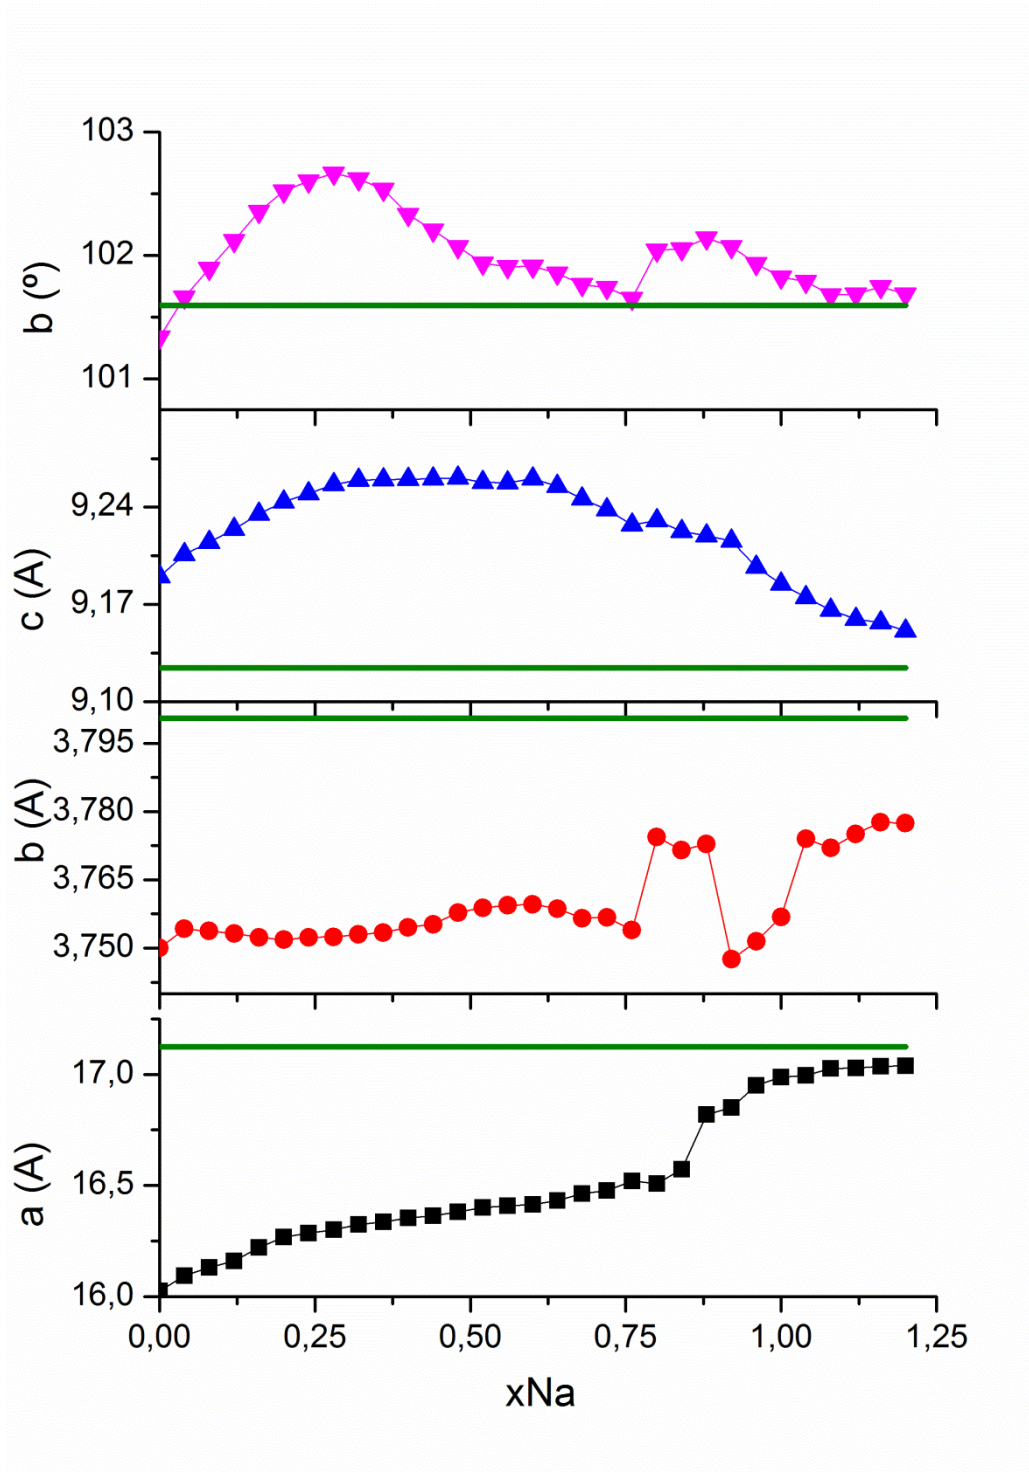

**Figure S 6.** Change in lattice parameters during the insertion of sodium ions in the first discharge. The parameters of pristine  $\text{Na}_2\text{Ti}_3\text{O}_7$  are shown in the green line.

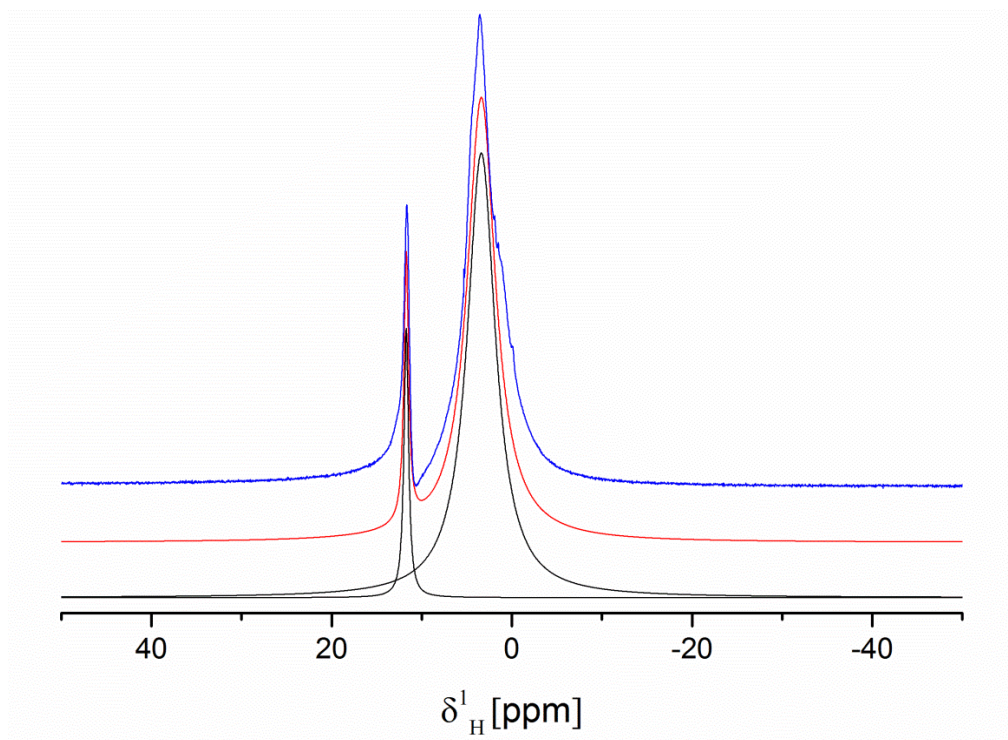

**Figure S 7.** Experimental and fitting NMR spectra of  $\text{H}_2\text{Ti}_5\text{O}_7$  after two cycles in the 0.9V-2.2V range. Integrating the 11ppm signal about 0.2 mols of H/f.u. remain in the structure. The broad peak at 3.7 ppm might be the H signal for dimethyl carbonate from the electrolyte according to literature. 0.2 mol is a low limit considering that the whole sample is pure titanate, however the contribution from the carbonate component has not been considered.



**Table S1.** Reliability factors obtained from the combined refinement of PXRD and PND data without (left) and with protons (right) in the structure.

|                                   | Without protons        |                                            |                                           | With protons        |                                            |                                           |
|-----------------------------------|------------------------|--------------------------------------------|-------------------------------------------|---------------------|--------------------------------------------|-------------------------------------------|
|                                   | X-ray                  | Neutron<br>( $\lambda=1.287 \text{ \AA}$ ) | Neutron<br>( $\lambda=2.52 \text{ \AA}$ ) | X-ray               | Neutron<br>( $\lambda=1.287 \text{ \AA}$ ) | Neutron<br>( $\lambda=2.52 \text{ \AA}$ ) |
|                                   | Without H <sup>+</sup> |                                            |                                           | With H <sup>+</sup> |                                            |                                           |
| <b>Global <math>\chi^2</math></b> | 26.7                   |                                            |                                           | 7.03                |                                            |                                           |
| $\chi^2$                          | 17.1                   | 20.8                                       | 41.2                                      | 7.91                | 5.74                                       | 6.7                                       |
| <b>R<sub>p</sub></b>              | 28.7                   | 32.3                                       | 30.4                                      | 20.6                | 15.7                                       | 16.2                                      |
| <b>R<sub>wp</sub></b>             | 32.3                   | 29.2                                       | 27.5                                      | 21.9                | 14.4                                       | 11.0                                      |
| <b>R<sub>B</sub></b>              | 19.5                   | 25.6                                       | 22                                        | 7.95                | 7.36                                       | 7.55                                      |
| <b>R<sub>F</sub></b>              | 11.6                   | 17                                         | 17.9                                      | 6.87                | 4.88                                       | 8.06                                      |

**Global factors with protons**

|                       |       |
|-----------------------|-------|
| $\chi^2$              | 2.069 |
| <b>R<sub>p</sub></b>  | 0.097 |
| <b>R<sub>wp</sub></b> | 0.083 |
| <b>R<sub>B</sub></b>  | 0.032 |
| <b>R<sub>F</sub></b>  | 0.022 |

**Table S2.** Atomic positions of H<sub>2</sub>Ti<sub>3</sub>O<sub>7</sub> as obtained from the combined refinement of PXRD and PND data with space group C2/m and the introduction of the 3 protons.

|      | Wyckoff position | x          | y   | z          | Biso      |
|------|------------------|------------|-----|------------|-----------|
| Ti 1 | 4i               | 0.2288(6)  | 0   | 0.2140(10) | 1.52(18)  |
| Ti 2 | 4i               | 0.1715(7)  | 0   | 0.5107(11) | 1.52(18)  |
| Ti 3 | 4i               | 0.1254(6)  | 0   | 0.8297(10) | 1.52(18)  |
| O 1  | 4i               | 0.1684(9)  | 0   | 0.0330(19) | 1.05(15)  |
| O 2  | 4i               | 0.1339(10) | 0   | 0.3161(18) | 1.05(15)  |
| O 3  | 4i               | 0.0813(11) | 0   | 0.6076(18) | 1.05(15)  |
| O 4  | 4i               | 0.0096(10) | 0   | 0.8606(18) | 1.05(15)  |
| O 5  | 4i               | 0.3505(8)  | 0   | 0.1763(15) | -0.14(11) |
| O 6  | 4i               | 0.2942(10) | 0   | 0.4568(18) | -0.14(11) |
| O 7  | 4i               | 0.2355(9)  | 0   | 0.7456(17) | -0.14(11) |
| H 1  | 2c               | 0.00000    | 0   | 0.50000    | 5.8(7)    |
| H 2  | 4i               | 0.036(2)   | 0   | 0.183(4)   | 5.8(7)    |
| H 3  | 2a               | 0.50000    | 0.5 | 0.00000    | 5.8(7)    |

|           | d(Ti 1-O) (Å) | d(Ti2-O) (Å)                  | d(Ti3-O) (Å)  | d(H1-O) (Å)  | d(H2-O) (Å) | d(H3-O) (Å)  |
|-----------|---------------|-------------------------------|---------------|--------------|-------------|--------------|
| <b>01</b> | 1.75(2)       | -                             | 1.86(2)       | -            | -           | -            |
| <b>02</b> | 1.94(2)       | 1.78(2)                       | -             | -            | 1.79(3)     | -            |
| <b>03</b> | -             | 1.84(2)                       | 2.03(2)       | (2x) 1.48(2) | -           | -            |
| <b>04</b> | -             | -                             | 1.93(2)       | -            | 0.76(3)     | (2x) 1.32(2) |
| <b>05</b> | 2.05(2)       | -                             | (2x) 1.917(4) | -            | -           | -            |
| <b>06</b> | 2.27(2)       | (2x) 1.960(5)<br>(1x) 2.12(2) | -             | -            | -           | -            |
| <b>07</b> | (2x) 1.974(5) | 2.20(2)                       | 2.06(2)       | -            | -           | -            |

**Table S3.** Agreement factors, atomic positions and distances of  $\text{H}_2\text{Ti}_3\text{O}_7$  as obtained from the refinement of PND data of wavelength of 1.28 Å introducing the strain microstructural parameters with space group  $C2/m$ .

**Neutron**  
**( $\lambda=1.287$  Å)**

|          |       |
|----------|-------|
| $\chi^2$ | 2.29  |
| $R_p$    | 0.106 |
| $R_{wp}$ | 0.090 |
| $R_B$    | 0.043 |
| $R_F$    | 0.029 |

|      | Wyckoff position | x         | y   | z         | Biso    |
|------|------------------|-----------|-----|-----------|---------|
| Ti 1 | 4i               | 0.225(1)  | 0   | 0.211(2)  | 0.1 (2) |
| Ti 2 | 4i               | 0.173(1)  | 0   | 0.515(2)  | 0.4 (3) |
| Ti 3 | 4i               | 0.122(1)  | 0   | 0.824(2)  | 0.4 (2) |
| O 1  | 4i               | 0.1710(6) | 0   | 0.035(1)  | 0.2 (2) |
| O 2  | 4i               | 0.1339(6) | 0   | 0.316(1)  | 0.1 (2) |
| O 3  | 4i               | 0.0798(8) | 0   | 0.604(2)  | 1.2 (2) |
| O 4  | 4i               | 0.0132(8) | 0   | 0.865(2)  | 1.7 (2) |
| O 5  | 4i               | 0.3502(6) | 0   | 0.180 (1) | 0.5 (2) |
| O 6  | 4i               | 0.2951(6) | 0   | 0.457(1)  | 0.1(2)  |
| O 7  | 4i               | 0.2371(6) | 0   | 0.744(1)  | 0.3 (2) |
| H 1  | 2c               | 0         | 0   | 0.5       | 4.4 (3) |
| H 2  | 4i               | 0.043(2)  | 0   | 0.193 (2) | 4.4 (3) |
| H 3  | 2a               | 0.5       | 0.5 | 0         | 4.4 (3) |

|           | d(Ti 1- O) (Å) | d(Ti2-O) (Å)                    | d(Ti3-O) (Å)   | d(H1-O) (Å)   | d(H2-O) (Å) | d(H3-O) (Å)   |
|-----------|----------------|---------------------------------|----------------|---------------|-------------|---------------|
| <b>01</b> | 1.68 (2)       | -                               | 1.94 (2)       | -             | -           | -             |
| <b>02</b> | 1.91 (2)       | 1.81 (2)                        | -              | -             | 1.65 (2)    | -             |
| <b>03</b> | -              | 1.84 (3)                        | 2.00 (2)       | (2x) 1.44 (1) | -           | -             |
| <b>04</b> | -              | -                               | 1.86 (2)       | -             | 0.96 (2)    | (2x) 1.30 (2) |
| <b>05</b> | 2.08 (2)       | -                               | (2x) 1.931 (4) | -             | -           | -             |
| <b>06</b> | 2.31 (2)       | (2x) 1.948 (5)<br>(1x) 2.13 (2) | -              | -             | -           | -             |
| <b>07</b> | (2x) 1.991 (5) | 2.15 (2)                        | 2.12 (2)       | -             | -           | -             |

**Table 4.** Agreement factors, atomic positions and distances of  $\text{H}_2\text{Ti}_3\text{O}_7$  as obtained from the refinement of PND data of wavelength of 1.28 Å introducing the strain microstructural parameters considering the splitting of H1 and the Baniso of H1 and H3 with space group  $C2/m$ .

| Neutron<br>( $\lambda=1.287 \text{ \AA}$ ) |       |
|--------------------------------------------|-------|
| $\chi^2$                                   | 2.02  |
| $R_p$                                      | 0.099 |
| $R_{wp}$                                   | 0.084 |
| $R_B$                                      | 0.034 |
| $R_F$                                      | 0.023 |

|      | Wyckoff position | x         | y | z        | Biso    |
|------|------------------|-----------|---|----------|---------|
| Ti 1 | 4i               | 0.227(1)  | 0 | 0.214(2) | 1.0 (3) |
| Ti 2 | 4i               | 0.173(1)  | 0 | 0.510(2) | 0.7 (3) |
| Ti 3 | 4i               | 0.1206(8) | 0 | 0.827(2) | 0.2 (2) |
| O 1  | 4i               | 0.1706(5) | 0 | 0.034(1) | 0.3 (2) |
| O 2  | 4i               | 0.1350(6) | 0 | 0.317(1) | 0.7 (2) |
| O 3  | 4i               | 0.0788(8) | 0 | 0.602(2) | 1.0 (2) |
| O 4  | 4i               | 0.0128(7) | 0 | 0.863(2) | 1.8 (2) |
| O 5  | 4i               | 0.3504(5) | 0 | 0.182(1) | 0.5 (2) |
| O 6  | 4i               | 0.2927(5) | 0 | 0.454(1) | 0.2(2)  |
| O 7  | 4i               | 0.2390(6) | 0 | 0.747(1) | 0.4 (2) |
| H 1  | 4i               | 0.035(6)  | 0 | 0.522(2) | Aniso   |
| H 2  | 4i               | 0.046(1)  | 0 | 0.195(2) | 2.0 (3) |
| H 3  | 2a               | 0         | 0 | 0        | Aniso   |

|           | d(Ti 1- O) (Å) | d(Ti2-O) (Å)   | d(Ti3-O) (Å)   | d(H1-O) (Å)          | d(H2-O) (Å) | d(H3-O) (Å)   |
|-----------|----------------|----------------|----------------|----------------------|-------------|---------------|
| <b>O1</b> | 1.72 (2)       | -              | 1.91 (2)       | -                    | -           | -             |
| <b>O2</b> | 1.91 (2)       | 1.76 (2)       | -              | -                    | 1.64 (2)    | -             |
| <b>O3</b> | -              | 1.88 (3)       | 2.04 (2)       | 0.91 (6)<br>1.95 (8) | -           | -             |
| <b>O4</b> | 1.97 (5)       | -              | -              | -                    | -           | -             |
| <b>O5</b> | -              | -              | 1.82 (2)       | -                    | 0.98 (2)    | (2x) 1.32 (2) |
| <b>O6</b> | 2.06 (2)       | -              | (2x) 1.938 (4) | -                    | -           | -             |
| <b>O7</b> | (2x) 2.25 (2)  | (2x) 1.964 (6) | -              | -                    | -           | -             |

**Table 5.** Agreement factors of the data collected by us of  $\text{H}_2\text{Ti}_3\text{O}_7$  as obtained from the refinement of PND data of wavelength of 1.28 Å according to the model from CIF file reported by *Kataoka et al.* with space group  $C2/m$ .

Neutron

**( $\lambda=1.287 \text{ \AA}$ )**

|          |       |
|----------|-------|
| $\chi^2$ | 12.48 |
| $R_p$    | 0.229 |
| $R_{wp}$ | 0.225 |
| $R_B$    | 0.125 |
| $R_F$    | 0.082 |
